# Supplementary material for: The Sole Mycobacterium smegmatis MazF Toxin Targets tRNALys to Impart Highly Selective, Codon-Dependent Proteome Reprogramming
Source: Front Genet. 2020 Feb 14;10:1356. doi: 10.3389/fgene.2019.01356 (PMC7033543; doi:10.3389/fgene.2019.01356)
Supplement: Supplementary file 3 [file Table_2.xlsx]

## Sheet: Downregulated UP_keywords
	Supplementary Table 2. Terms (UniProt keywords) enriched in down- and up-regulated proteins according to the Functional Analysis tool in the DAVID platform
Category	Term	Count	%	PValue	Genes	List Total	Pop Hits	Pop Total	Fold Enrichment	Benjamini p-value
UP_KEYWORDS	FAD	11	6.43275	1.86691e-05	MSMEG_5941, MSMEG_6686, MSMEG_1497, MSMEG_6584, MSMEG_2080, MSMEG_0903, MSMEG_2070, MSMEG_1991, MSMEG_5197, MSMEG_1387, MSMEG_5494	171	76	6717	5.68536	0.00207014
UP_KEYWORDS	Flavoprotein	12	7.01754	7.45902e-05	MSMEG_5941, MSMEG_6686, MSMEG_1497, MSMEG_6584, MSMEG_6761, MSMEG_2080, MSMEG_0903, MSMEG_2070, MSMEG_1991, MSMEG_5197, MSMEG_1387, MSMEG_5494	171	107	6717	4.40531	0.00413135
UP_KEYWORDS	Oxidoreductase	37	21.6374	0.000436519	MSMEG_3225, MSMEG_5863, MSMEG_5941, MSMEG_1497, MSMEG_6686, MSMEG_6687, MSMEG_1140, MSMEG_2080, MSMEG_5197, MSMEG_5037, MSMEG_3657, MSMEG_6761, MSMEG_1682, MSMEG_0903, MSMEG_1991, MSMEG_0402, MSMEG_1602, MSMEG_5680, MSMEG_5913, MSMEG_3150, MSMEG_6459, MSMEG_1649, MSMEG_2070, MSMEG_6458, MSMEG_5494, MSMEG_2659, MSMEG_1654, MSMEG_2738, MSMEG_3317, MSMEG_6584, MSMEG_2075, MSMEG_5119, MSMEG_1980, MSM…	171	809	6717	1.79652	0.0160249
UP_KEYWORDS	Cytoplasm	17	9.94152	0.000883812	MSMEG_2723, MSMEG_0793, MSMEG_2423, MSMEG_1583, MSMEG_6280, MSMEG_1140, MSMEG_4672, MSMEG_2659, MSMEG_3061, MSMEG_0255, MSMEG_4630, MSMEG_0880, MSMEG_6021, MSMEG_4932, MSMEG_3640, MSMEG_4923, MSMEG_1179	171	261	6717	2.55851	0.024238
UP_KEYWORDS	Nucleotide-binding	21	12.2807	0.0010368	MSMEG_6366, MSMEG_0061, MSMEG_2723, MSMEG_0211, MSMEG_2423, MSMEG_6179, MSMEG_1583, MSMEG_6554, MSMEG_0616, MSMEG_2659, MSMEG_3061, MSMEG_6892, MSMEG_2392, MSMEG_0255, MSMEG_2690, MSMEG_4630, MSMEG_0880, MSMEG_1637, MSMEG_5571, MSMEG_6756, MSMEG_6759	171	371	6717	2.22344	0.0227657
UP_KEYWORDS	Transferase	31	18.1287	0.00284832	MSMEG_3160, MSMEG_3227, MSMEG_5310, MSMEG_6484, MSMEG_4248, MSMEG_2392, MSMEG_1350, MSMEG_2934, MSMEG_5721, MSMEG_0990, MSMEG_4932, MSMEG_5241, MSMEG_0793, MSMEG_0408, MSMEG_4233, MSMEG_1414, MSMEG_0367, MSMEG_4185, MSMEG_4827, MSMEG_2965, MSMEG_2073, MSMEG_3900, MSMEG_4328, MSMEG_4327, MSMEG_1637, MSMEG_3178, MSMEG_3640, MSMEG_6756, MSMEG_2122, MSMEG_6759, MSMEG_5548	171	705	6717	1.72724	0.0514009
UP_KEYWORDS	ATP-binding	18	10.5263	0.00410173	MSMEG_6366, MSMEG_0061, MSMEG_2723, MSMEG_0211, MSMEG_2423, MSMEG_6179, MSMEG_1583, MSMEG_6554, MSMEG_0616, MSMEG_3061, MSMEG_6892, MSMEG_2690, MSMEG_4630, MSMEG_0880, MSMEG_1637, MSMEG_5571, MSMEG_6756, MSMEG_6759	171	331	6717	2.13611	0.0630969
UP_KEYWORDS	Lipid metabolism	4	2.33918	0.0392193	MSMEG_5941, MSMEG_3150, MSMEG_2934, MSMEG_1140	171	30	6717	5.23743	0.426
UP_KEYWORDS	NAD	5	2.92398	0.0497864	MSMEG_2659, MSMEG_1140, MSMEG_0903, MSMEG_1602, MSMEG_1179	171	55	6717	3.57097	0.467325
UP_KEYWORDS	Metal-binding	17	9.94152	0.0557449	MSMEG_5863, MSMEG_6179, MSMEG_0832, MSMEG_1423, MSMEG_4185, MSMEG_3061, MSMEG_1654, MSMEG_2738, MSMEG_0255, MSMEG_3094, MSMEG_6021, MSMEG_0826, MSMEG_4829, MSMEG_1602, MSMEG_3640, MSMEG_1429, MSMEG_4668	171	411	6717	1.62475	0.470956
UP_KEYWORDS	Acyltransferase	7	4.09357	0.0685893	MSMEG_0408, MSMEG_2934, MSMEG_4328, MSMEG_4327, MSMEG_4248, MSMEG_5721, MSMEG_3640	171	114	6717	2.41197	0.51179
UP_KEYWORDS	Primosome	2	1.16959	0.0740321	MSMEG_3061, MSMEG_6892	171	3	6717	26.1871	0.509078
UP_KEYWORDS	DNA replication	3	1.75439	0.0977388	MSMEG_3061, MSMEG_6892, MSMEG_3178	171	21	6717	5.61153	0.584466

## Sheet: Up-regulated UP_keywords
Category	Term	Count	%	PValue	Genes	List Total	Pop Hits	Pop Total	Fold Enrichment	Benjamini p-value
UP_KEYWORDS	Ribosomal protein	18	14.2857	1.76e-16	MSMEG_1439, MSMEG_1438, MSMEG_2435, MSMEG_1466, MSMEG_4571, MSMEG_1441, MSMEG_1442, MSMEG_1470, MSMEG_1471, MSMEG_1472, MSMEG_6894, MSMEG_4625, MSMEG_4624, MSMEG_1346, MSMEG_1557, MSMEG_5431, MSMEG_1525, MSMEG_3791	126	59	6717	16.2639	2.11e-14
UP_KEYWORDS	Ribonucleoprotein	18	14.2857	2.42e-16	MSMEG_1439, MSMEG_1438, MSMEG_2435, MSMEG_1466, MSMEG_4571, MSMEG_1441, MSMEG_1442, MSMEG_1470, MSMEG_1471, MSMEG_1472, MSMEG_6894, MSMEG_4625, MSMEG_4624, MSMEG_1346, MSMEG_1557, MSMEG_5431, MSMEG_1525, MSMEG_3791	126	60	6717	15.9929	1.05e-14
UP_KEYWORDS	rRNA-binding	14	11.1111	1.34e-13	MSMEG_1439, MSMEG_1438, MSMEG_1466, MSMEG_4571, MSMEG_1441, MSMEG_1442, MSMEG_1470, MSMEG_1471, MSMEG_1472, MSMEG_6894, MSMEG_4625, MSMEG_1346, MSMEG_5431, MSMEG_3791	126	40	6717	18.6583	4.25e-12
UP_KEYWORDS	RNA-binding	16	12.6984	2.11e-13	MSMEG_1439, MSMEG_1438, MSMEG_1466, MSMEG_4571, MSMEG_1441, MSMEG_1442, MSMEG_1470, MSMEG_1471, MSMEG_1472, MSMEG_6894, MSMEG_2656, MSMEG_4625, MSMEG_1346, MSMEG_5042, MSMEG_5431, MSMEG_3791	126	62	6717	13.7573	5.02e-12
UP_KEYWORDS	Elongation factor	4	3.1746	0.000209	MSMEG_2520, MSMEG_1401, MSMEG_3035, MSMEG_5132	126	7	6717	30.4626	0.0039546
UP_KEYWORDS	Stress response	5	3.96825	0.000286	MSMEG_1914, MSMEG_4891, MSMEG_3582, MSMEG_4217, MSMEG_5042	126	18	6717	14.8082	0.00451472
UP_KEYWORDS	Coiled coil	8	6.34921	0.00144875	MSMEG_4626, MSMEG_4399, MSMEG_1770, MSMEG_4217, MSMEG_5263, MSMEG_0919, MSMEG_4273, MSMEG_1950	126	91	6717	4.68655	0.0194836
UP_KEYWORDS	Cytoplasm	13	10.3175	0.00325172	MSMEG_1401, MSMEG_2414, MSMEG_4217, MSMEG_1582, MSMEG_4627, MSMEG_4626, MSMEG_2520, MSMEG_2940, MSMEG_3582, MSMEG_2964, MSMEG_2656, MSMEG_3035, MSMEG_5042	126	261	6717	2.65526	0.0379387
UP_KEYWORDS	Isopeptide bond	5	3.96825	0.0165844	MSMEG_2520, MSMEG_4891, MSMEG_1346, MSMEG_4276, MSMEG_2317	126	53	6717	5.0292	0.161823
UP_KEYWORDS	Ubl conjugation	5	3.96825	0.0176598	MSMEG_2520, MSMEG_4891, MSMEG_1346, MSMEG_4276, MSMEG_2317	126	54	6717	4.93607	0.155717
UP_KEYWORDS	Protein biosynthesis	4	3.1746	0.0452725	MSMEG_2520, MSMEG_1401, MSMEG_3035, MSMEG_5132	126	43	6717	4.95903	0.329758
UP_KEYWORDS	Phosphoprotein	3	2.38095	0.0726738	MSMEG_4627, MSMEG_3647, MSMEG_4217	126	24	6717	6.66369	0.449711
